# Supplementary material for: Unexpected Diversity of Wolbachia Associated with Bactrocera dorsalis (Diptera: Tephritidae) in Africa
Source: MDPI journal article supplement (doi:10.3390/insects10060155), 2019-05-31
Supplement: s1 [file s1]

Article

# Unexpected Diversity of *Wolbachia* Associated with *Bactrocera dorsalis* (Diptera: Tephritidae) in Africa

Joseph Gichuhi <sup>1,2</sup>, Fathiya M. Khamis <sup>1</sup>, Johnnie Van den Berg <sup>2</sup>, Sunday Ekesi <sup>1</sup> and Jeremy K. Herren <sup>1,3,\*</sup>

<sup>1</sup> International Centre of Insect Physiology and Ecology (*icipe*), Kasarani, Nairobi, 00100, Kenya; jgichuhi@icipe.org (J.G.); fkhamis@icipe.org (F.M.K.); sekese@icipe.org (S.E.)

<sup>2</sup> Unit for Environmental Sciences and Management, North-West University, Potchefstroom, 2520, South Africa; johnnie.vandenberg@nwu.ac.za

<sup>3</sup> MRC-University of Glasgow Centre for Virus Research, Henry Wellcome Building, Glasgow, G61 1QH, UK

\* Correspondence: jherren@icipe.org

Received: 8 February 2019; Accepted: 20 May 2019; Published: date

**Supplementary material**

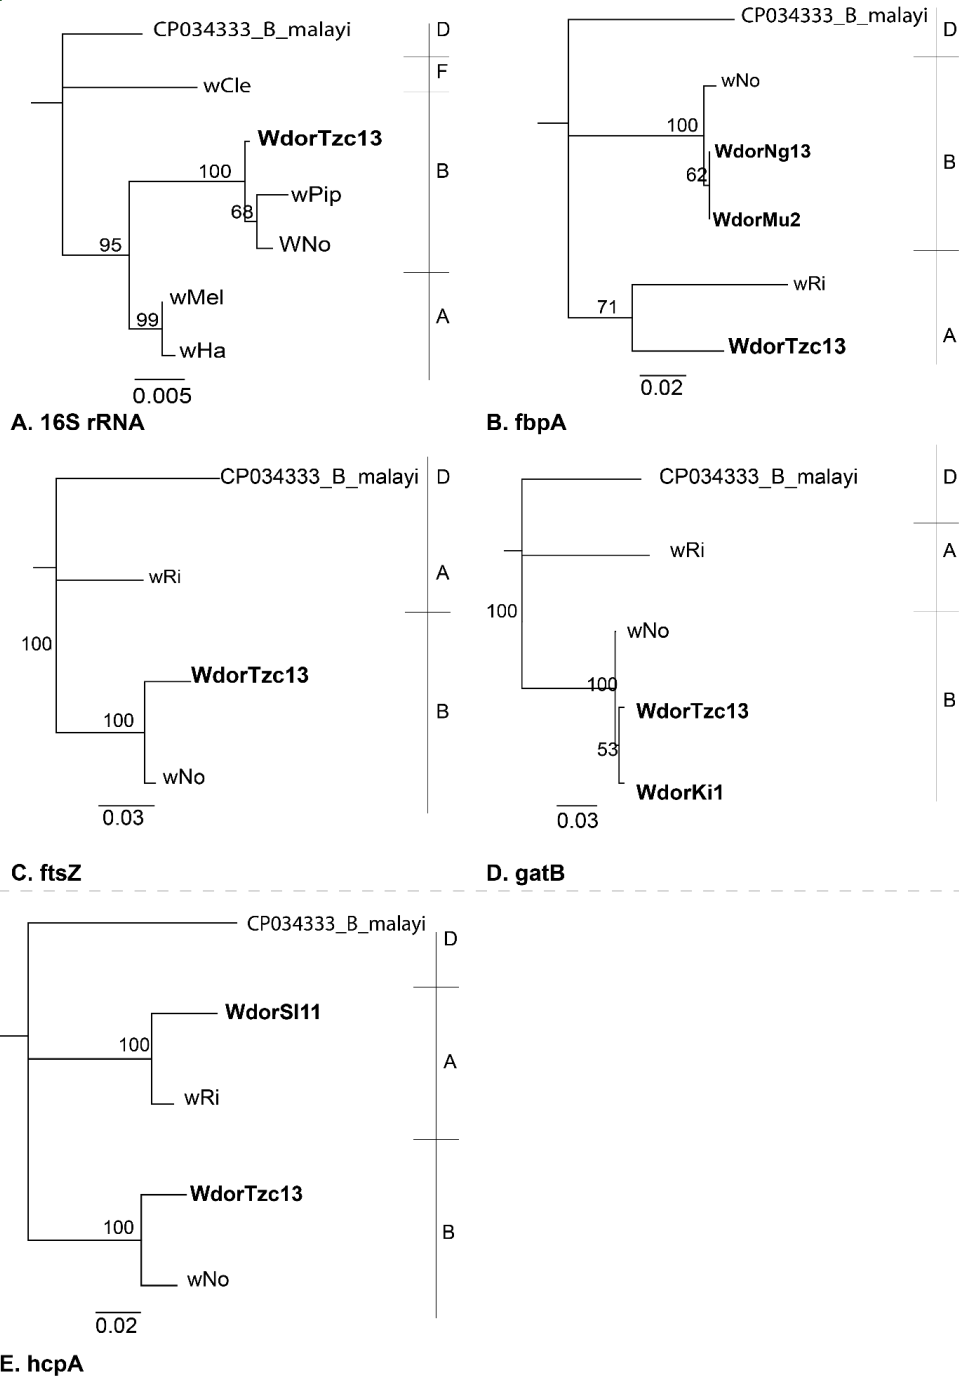

**Figure 1.** Neighbour joining trees showing relationship between *Wolbachia* in *B. dorsalis* (in bold) to strains in known super groups. Trees were generated from sequences of 16S rRNA (A), *fbpA* (B), *ftsZ* (C), *gatB* (D) and *hcpA* (E) genes. Sequences of *Wolbachia* endosymbiont of *Brugia malayi* are included as out-groups in all the trees and respective super groups are indicated to the right of each tree. The detected *Wolbachia* are denoted by W followed by the host denoted as dor (*B. dorsalis*), population (Tg-Togo, Tzc-Tanzania, Ki-Kitui, SI-Sri Lanka, Ng- Nguruman and Mu- Muranga) and population sample ID. Bootstrap values are indicated above branches. Branches with bootstrap support lower than 50% are collapsed.

**Table S1.** *Wolbachia* MLST and *wsp* gene allelic profiles. Exact matches to alleles present in the database are shown whereas instances where no exact matches were found are represented as N. Dashes represent the genes for each strain that could not be amplified. GenBank accession numbers for respective sequences are shown in brackets.

| Strain    | MLST typing allele numbers |                   |                 |                 |                 | WSP typing allele numbers |      |      |      |      |
|-----------|----------------------------|-------------------|-----------------|-----------------|-----------------|---------------------------|------|------|------|------|
|           | <i>gatB</i>                | <i>coxA</i>       | <i>hcpA</i>     | <i>ftsZ</i>     | <i>fpbA</i>     | <i>wsp</i>                | HVR1 | HVR2 | HVR3 | HVR4 |
| WdorNg13  | -                          | N<br>(MK314069)   | -               | -               | N<br>(MK875805) | N<br>(MK314063)           | 264  | N    | 3    | 239  |
| WdorMu2   | -                          | N<br>(MK314068)   | -               | -               | N<br>(MK875804) | N<br>(MK314062)           | 264  | N    | 3    | 239  |
| WdorKi1   | N<br>(MK875808)            | 224<br>(MK314067) | -               | -               | -               | N<br>(MK314064)           | N    | N    | N    | N    |
| WdorTzc13 | N<br>(MK875807)            | 73<br>(MK314070)  | N<br>(MK875809) | N<br>(MK875815) | N<br>(MK875806) | N<br>(MK314064)           | 148  | 141  | 239  | 102  |
| WdorSu6   | -                          | -                 | -               | -               | -               | N<br>(MK875814)           | N    | N    | N    | N    |
| WdorBe3   | -                          | -                 | -               | -               | -               | N<br>(MK875811)           | 10   | 8    | N    | N    |
| WdorGh4   | -                          | -                 | -               | -               | -               | N<br>(MK875812)           | N    | N    | N    | N    |

|          |   |                  |                 |   |   |                 |   |    |    |    |
|----------|---|------------------|-----------------|---|---|-----------------|---|----|----|----|
| WdorTg6  | - | N<br>(MK314071)  | -               | - | - | N<br>(MK314065) | N | N  | N  | N  |
| WdorSl6  | - | -                | -               | - | - | N<br>(MK875813) | N | 12 | 21 | 90 |
| WdorSl11 | - | 15<br>(MK314072) | N<br>(MK875810) | - | - | N<br>(MK314066) | N | 8  | N  | N  |
